# Supplementary material for: Automated, image-based disease measurement for phenotyping resistance to soybean frogeye leaf spot
Source: Springer Nature journal article supplement (doi:10.1186/s13007-022-00934-7), 2022-08-16
Supplement: 13007_2022_934_MOESM1_ESM.pdf [file 13007_2022_934_MOESM1_ESM.pdf]

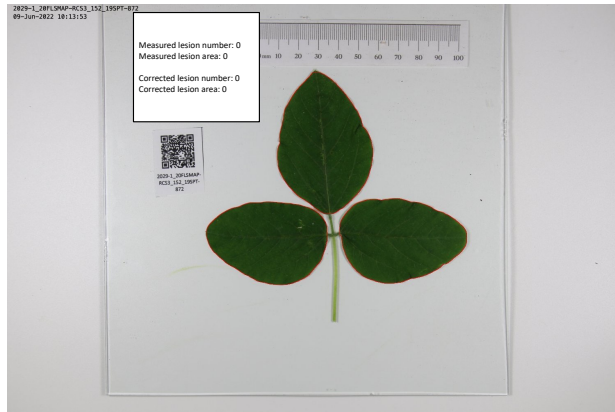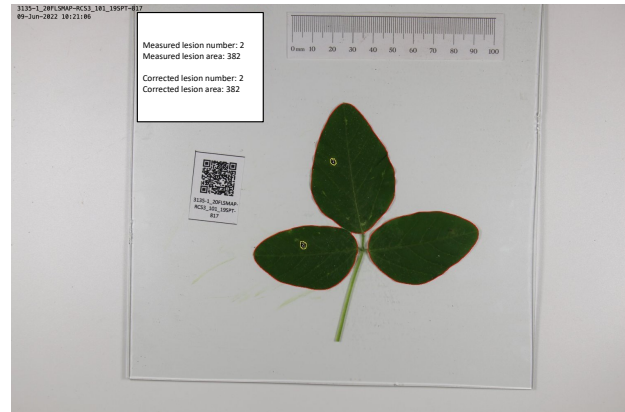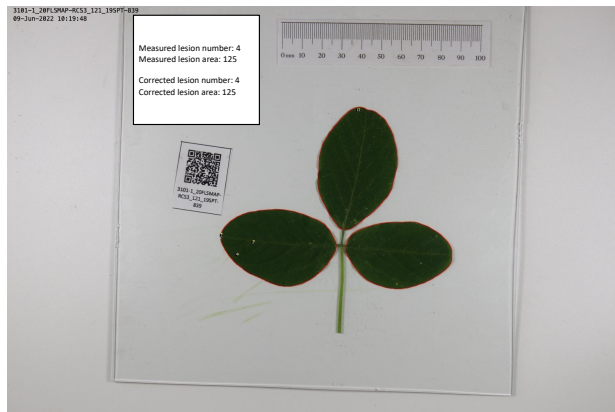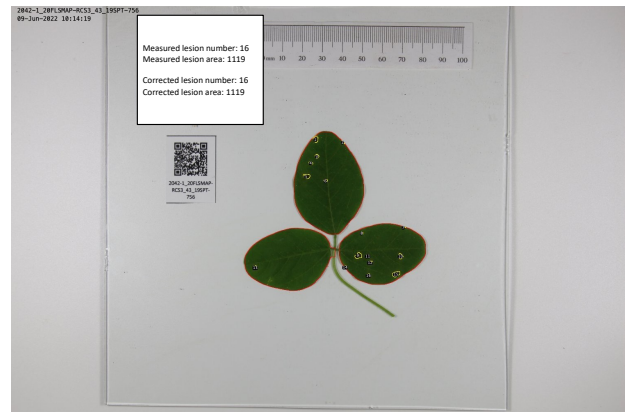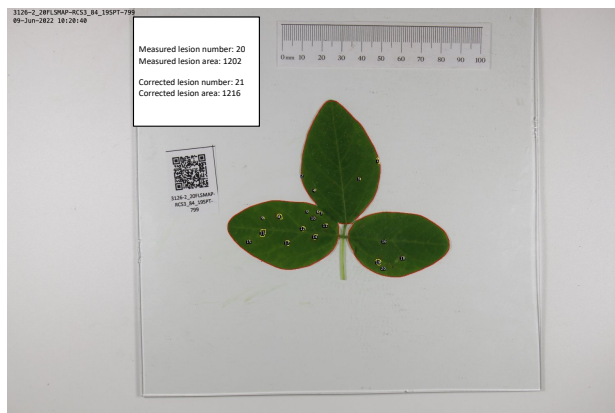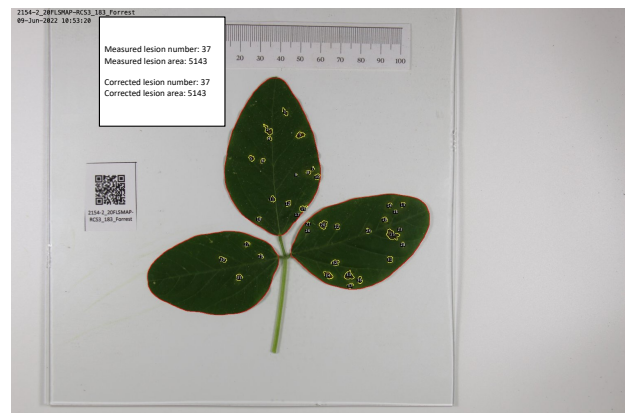

**Additional File 1** Result images with disease severity ranging from completely resistant to highly susceptible to frogeye leaf spot. Lesion number and lesion area as measured automatically by the image analysis software, are indicated on each image. Corrected lesion number and lesion area were determined by making manual corrections to images after processing.
